# Supplementary material
Source: PubMed Central journal article supplement (PMC7878311)
Supplement: NIHMS1639741-supplement-Supplemental_Digital_Content_2.pdf [file NIHMS1639741-supplement-Supplemental_Digital_Content_2.pdf]

**Figure 1.** Generalized additive model plots of weight gain during the immediate period (first 6-months) after ART initiation by regimen among people living with HIV from CNICS sites across the United States who initiated their first antiretroviral regimen between 2012-2019

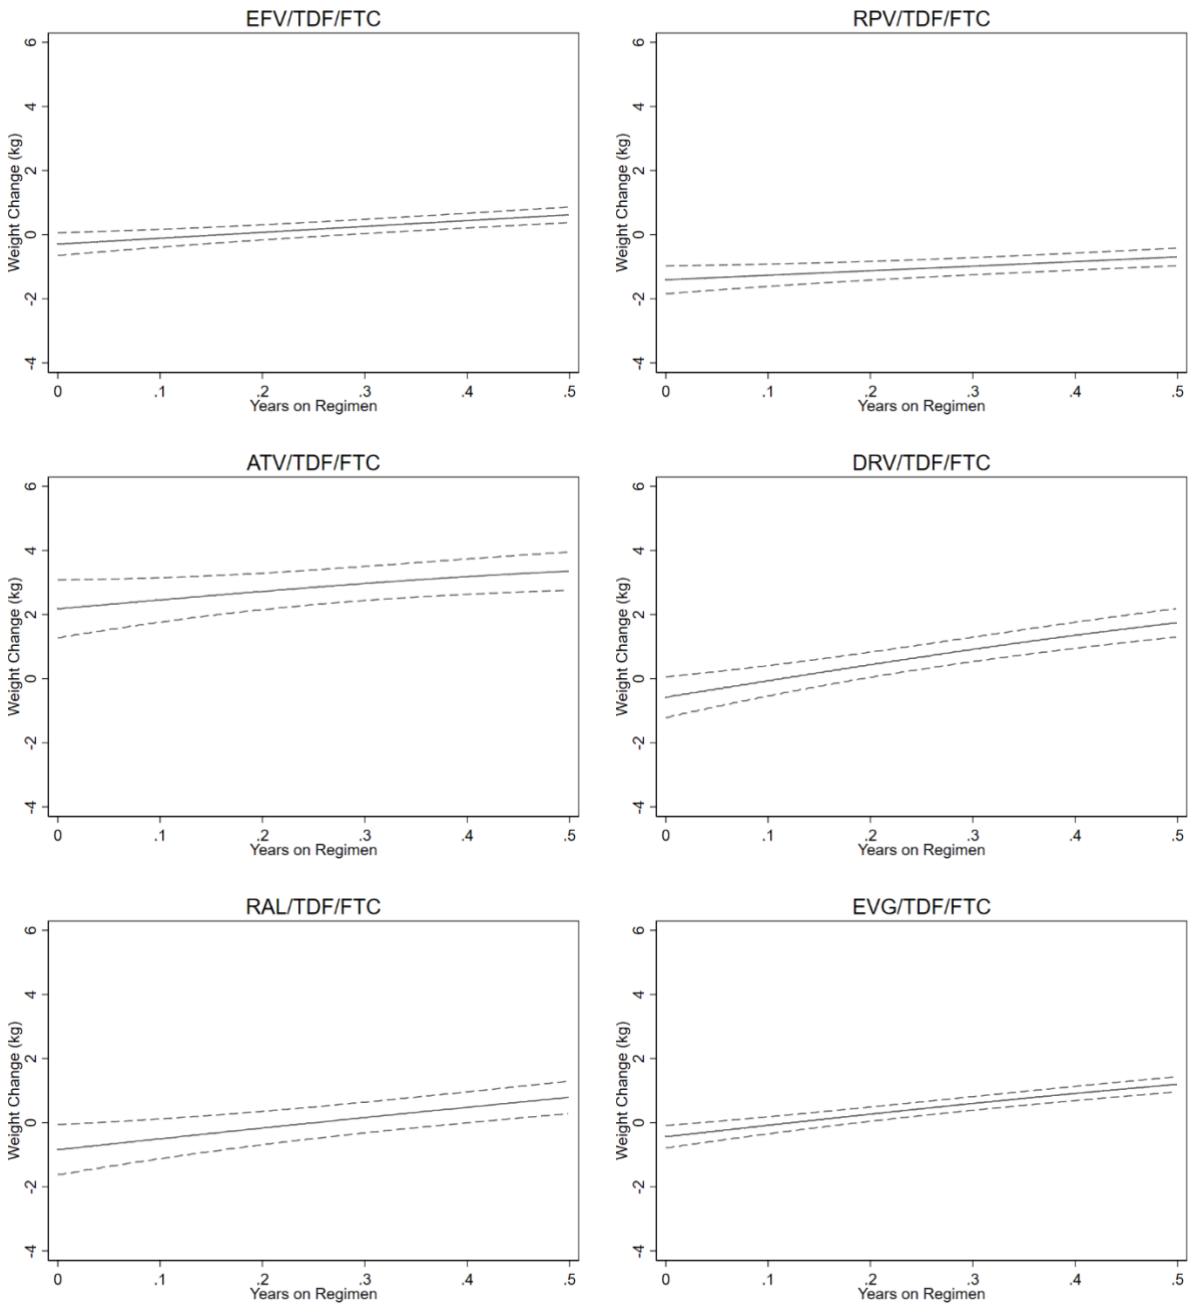

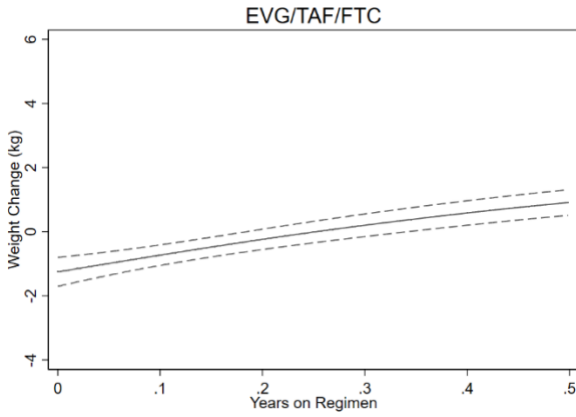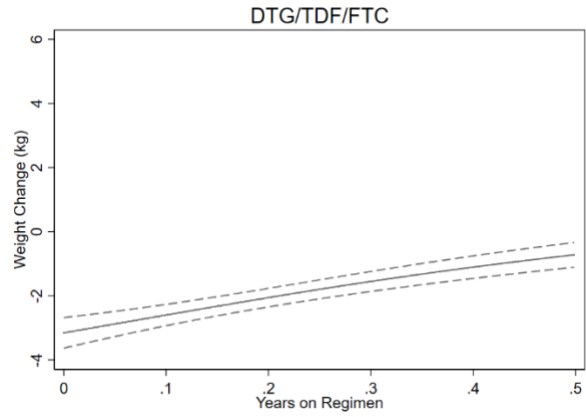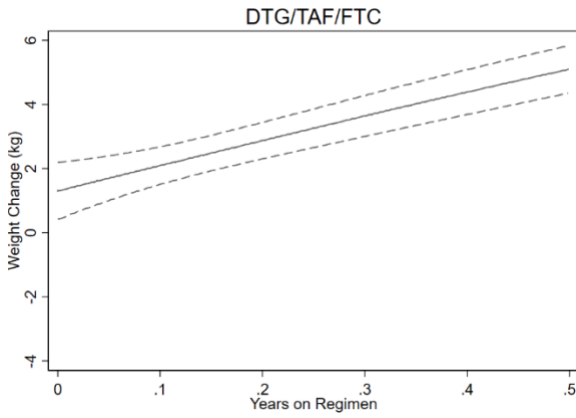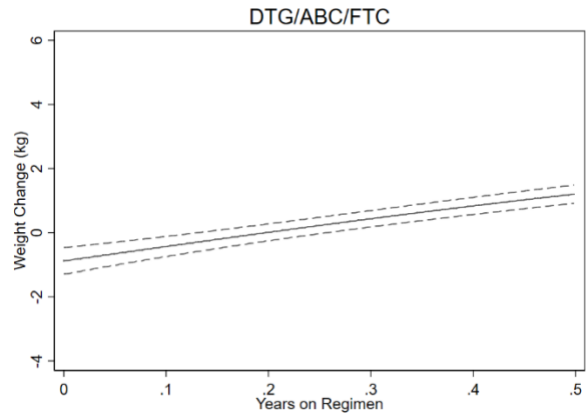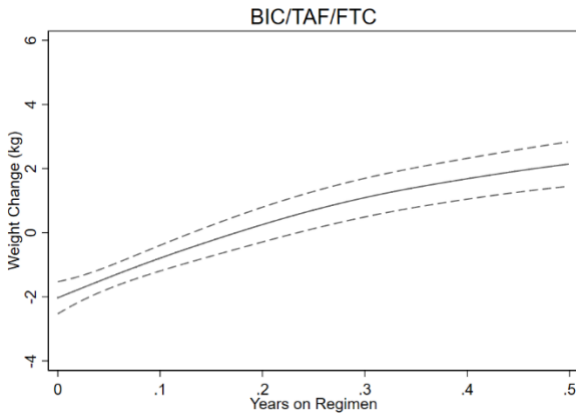

Abbreviations: CNICS: Centers for AIDS Research Network of Integrated Clinical Systems, EFV: efavirenz, RPV: rilpivirine, ATV: atazanavir, DRV: darunavir, RAL: raltegravir, EVG: elvitegravir, DTG: dolutegravir, BIC: bictegravir, TDF: tenofovir disoproxil fumarate, TAF: tenofovir alafenamide fumarate, ABC: abacavir
